# Supplementary material for: Target Lines for in Planta Gene Stacking in Japonica Rice
Source: MDPI journal article supplement (doi:10.3390/ijms23169385), 2022-08-20
Supplement: s1 [file s1]

**Table S1.** Summary of screening for rice target lines

| Screening                       | No. of<br>plants for pZH36 | No. of<br>plants for pZH37 | Total |
|---------------------------------|----------------------------|----------------------------|-------|
| hygromycin-resistant            | 1717                       | 2236                       | 3953  |
| <i>gusplus</i> PCR              | 1566                       | 1570                       | 3136  |
| 1st qPCR ( <i>gus</i> )         | 844                        | 600                        | 1444  |
| 2nd qPCR ( <i>hpt</i> )         | 307                        | 166                        | 471   |
| Southern (LB, <i>hpt</i> probe) | 93                         | 96                         | 188   |
| Southern (RB, <i>gus</i> probe) | 46                         | 30                         | 76    |
| TAIL-PCR (LB)                   | 34                         | 28                         | 62    |
| extragenic                      | 13                         | 15                         | 28    |
| TAIL-PCR (RB)                   | 10                         | 6                          | 16    |
| near ATG start                  | 4                          | 1                          | 5     |
| near centromere                 | 3                          | 1                          | 4     |
| Target lines                    | 3                          | 4                          | 7     |

Table S2. Primers used for this study

| Name of primers | Sequence ( 5' - 3' )                                      | Function                                                           |
|-----------------|-----------------------------------------------------------|--------------------------------------------------------------------|
| hptF            | tcgtccatcacagtttgcc                                       | qRT-PCR for <i>hpt</i>                                             |
| hptR            | tcggtcaatacactacatgcc                                     | qRT-PCR for <i>hpt</i>                                             |
| spsF            | ttgcgcctgaacggatat                                        | qRT-PCR for <i>SPS</i>                                             |
| spsR            | cggttgatcttttcgggatg                                      | qRT-PCR for <i>SPS</i>                                             |
| gusplusF:       | cgtcccaagcagttacaatg                                      | PCR and qRT-PCR for <i>gusplus</i>                                 |
| gusplusR        | cgttcgtaccagacatatccg                                     | PCR and qRT-PCR for <i>gusplus</i>                                 |
| LAD1            | acgatggactccagagcggccgc (g/c/a) n (g/c/a) nnnggaa         | Primers for TAIL-PCR for target line T-DNA insertion site analysis |
| LAD2            | acgatggactccagagcggccgc (g/c/t) n (g/c/t) nnnnggtt        |                                                                    |
| LAD3            | acgatggactccagagcggccgc (g/c/a) (g/c/a) n (g/c/a) nnccaa  |                                                                    |
| LAD4            | acgatggactccagagcggccgc (g/c/t) (g/c/t) n (g/c/t) nnncggt |                                                                    |
| AC              | acgatggactccagag                                          | RB specific primers for transformants of pZH36 and pZH37           |
| RB1             | cgtgactgggaaaaccctggcggtt-                                |                                                                    |
| RB2             | acgatggactccagtcggcccaacttaatcgccctgcagcacatc             |                                                                    |
| RB3             | gaagaggcccgccacgatcgccctt                                 |                                                                    |
| LB1             | ggatcgccacgactccggcgta                                    | LB specific primers for transformants of pZH36 and pZH37           |
| LB2             | acgatggactccagtcggccgctcggcgctacacaaatcgcccg              |                                                                    |
| LB3             | ccgagggcaaagaatagccatggg                                  |                                                                    |
| hptpF           | atgaaaaagcctgaactcacgcgac                                 | <i>hpt</i> probe for Southern blot                                 |
| hptpR           | ctatttctttgcctcggacgagtgc                                 |                                                                    |
| guspluspF       | atggtagatctgagggtaaatttcta                                | <i>gusplus</i> probe for Southern blot                             |
| guspluspR       | tcacacgtgatggtgatggtgatggc                                |                                                                    |
| gfppF           | atggtgagcaaggcgaggagctg                                   | <i>gfp</i> probe for Southern blot                                 |
| gfppR           | ttacttgtagctcgtccatgc                                     |                                                                    |
| barpF           | atgagcccagaacgacgcc                                       | <i>bar</i> probe for Southern blot                                 |
| barpR           | tcaaattctcggtgacgggca                                     |                                                                    |
| a               | cagattgcttggtatggct                                       | Recombination junction for type I site-specific integration        |
| b               | ggtgaactaccgatgatcgtaaga                                  |                                                                    |
| c               | cggcgaactaataacgtca                                       |                                                                    |
| d               | tcaaattctcggtgacgggca                                     |                                                                    |
| e               | accgcctttgagtga                                           | Recombination junction for type II site-specific integration       |
| f               | tgatccaagctcaagctgct                                      |                                                                    |
| g               | tcaaattctcggtgacgggca                                     |                                                                    |
| h               | cggcgaactaataacgtca                                       |                                                                    |
| Bxb1-f          | atgagagccctggtagtcatcc                                    | Bxb1 integrase                                                     |
| Bxb1-R          | cgacatcccgtgtgtagc                                        |                                                                    |
